# Supplementary material for: The DNA methylation level against the background of the genome size and t-heterochromatin content in some species of the genus Secale L
Source: PeerJ. 2017 Jan 24;5:e2889. doi: 10.7717/peerj.2889 (PMC5267573; doi:10.7717/peerj.2889)
Supplement: Supplemental Information 1 [file peerj-05-2889-s001.xlsx]

## Sheet: Arkusz1
S. c. ssp. afghanicum	66	89.068	58.937	71.335	80.189	88	78	70.385	72	80	65.989	73
S. s. ssp. africanum	61.751	75.847	76.77	66.37	75.31	80.222	55.625	68.822	60.446	58.674	78.925	75.483
S. cereale	75.716	75.162	63.291	84.089	73.194	71.639	71.104	59.291	62.648	71.858	59.878	69.789
S. s. ssp. kuprijanovii	81	53.989	60.12	87	52.709	68.091	90	49.13	58.691	93.992	48.339	61.596
S. c. ssp. segetale	81	82.584	83.12	89	83.432	93.351	86	69.088	86.84	82	69.66	88.221
S. sylvestre	61.885	46.676	65.346	60.057	50.473	73.558	59.208	60	72.235	62.148	47.426	74.034
S. strictum	70.935	55.455	39.559	66.754	58.129	39.804	54.333	50.634	57	51.707	47.689	38.712
S. vavilovii	62.072	79.332	72.547	59.098	80.687	76.596	55.313	61.775	57	57.283	64.03	71.33
