# Supplementary material for: The DNA methylation level against the background of the genome size and t-heterochromatin content in some species of the genus Secale L
Source: PeerJ. 2017 Jan 24;5:e2889. doi: 10.7717/peerj.2889 (PMC5267573; doi:10.7717/peerj.2889)
Supplement: Supplemental Information 2 [file peerj-05-2889-s002.xlsx]

## Sheet: Arkusz1
		2C
S. c. ssp. afghanicum	1	16.8753
	2	16.7453
	3	15.8749
	4	15.7636
S. s. ssp. africanum	1	15.0587
	2	15.0715
	3	14.4609
	4	14.4337
S. s. ssp. kuprijanovii	1	15.0791
	2	15.0299
	3	15.4001
	4	15.4044
S. c. ssp. segetale	1	15.9517
	2	15.8872
	3	16.203
	4	16.2361
S. strictum	1	16.08
	2	16.1
	3	15.94
	4	15.9386
	5	16.5195
	6	16.7279
S. sylvestre	1	16.2
	2	16.5
	3	15.89
	4	16.23
S. vavilovii	1	16.93
	2	16.98
	3	16.25
	4	16.29
	5	16.6929
	6	16.5876
	7	16.9163
